# Supplementary material for: MicroRNA-146b-5p Suppresses Pro-Inflammatory Mediator Synthesis via Targeting TRAF6, IRAK1, and RELA in Lipopolysaccharide-Stimulated Human Dental Pulp Cells
Source: MDPI journal article supplement (doi:10.3390/ijms24087433), 2023-04-18
Supplement: s1 [file s1]

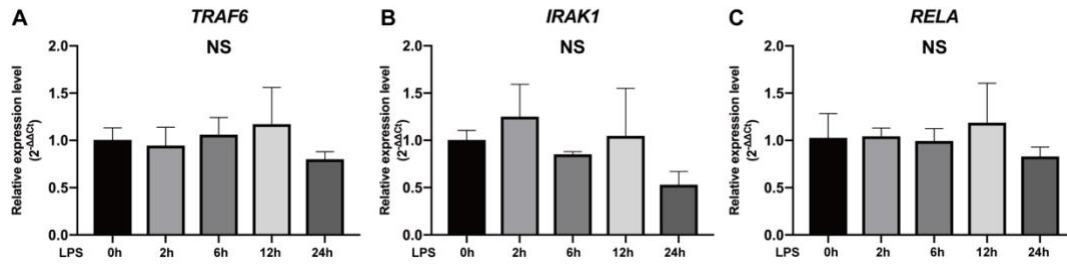

**Figure S2.** mRNA expression levels of *TRAF6*, *IRAK1*, and *RELA* in LPS-stimulated hDPCs at different time points. **(A)** mRNA expression of *TRAF6* was constant in LPS stimulation at different time courses (mean  $\pm$  SD, n = 4). **(B)** mRNA expression of *IRAK1* was constant in LPS stimulation at different time courses (mean  $\pm$  SD, n = 4). **(C)** mRNA expression of *RELA* was constant in LPS stimulation at different time courses (mean  $\pm$  SD, n = 4). NS: no significant difference; LPS: lipopolysaccharide; hDPCs: human dental pulp cells.
