# Supplementary material for: MicroRNA-146b-5p Suppresses Pro-Inflammatory Mediator Synthesis via Targeting TRAF6, IRAK1, and RELA in Lipopolysaccharide-Stimulated Human Dental Pulp Cells
Source: MDPI journal article supplement (doi:10.3390/ijms24087433), 2023-04-18
Supplement: s1 [file s1]

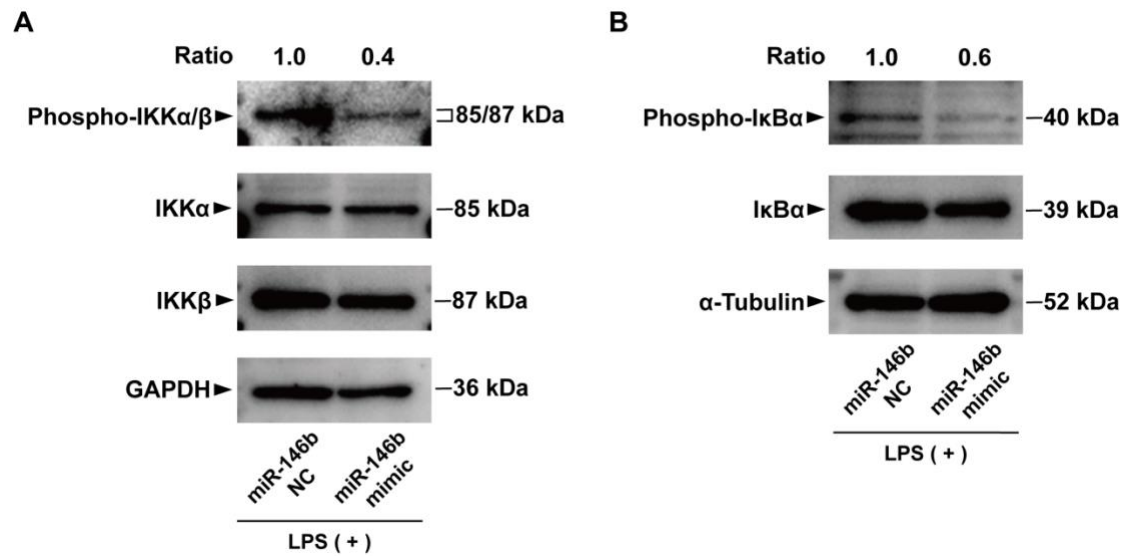

**Figure S1.** Phosphorylation of IKKα/β and IκBα was down-regulated by hsa-miR-146b-5p. (A) Expression of phosphorylated IKKα/β was down-regulated by hsa-miR-146b-5p mimic in LPS-stimulated hDPCs. (B) Expression of phosphorylated IκBα was down-regulated by hsa-miR-146b-5p mimic in LPS-stimulated hDPCs. LPS: lipopolysaccharide; hDPCs: human dental pulp cells; miR-146b NC: miRNA mimic Negative Control #1; miR-146b mimic: miRNA mimic for hsa-miR-146b-5p.
